# 1 Adolescent Dating and HIV Perceptions: A Phenomenological Study in

## 2 N'Djamena, Chad

3 Esias Bedingar<sup>1,2,5</sup>, Ngarossorang Bedingar<sup>3</sup>, Djimet Seli<sup>4</sup>, Christopher Sudfeld<sup>1\*</sup>

4

5 <sup>1</sup>Department of Global Health and Population, Harvard T.H. Chan School of Public Health, Boston, USA

6 <sup>2</sup>Alma, Centre de Recherche en Systèmes de Santé, Porte 137 Chagoua, N'Djamena, Chad

7 <sup>3</sup>Croix Bleue Tchadienne, Porte N128, 7eme arrondissement, Chagoua, N'Djamena, Chad

8 <sup>4</sup>Centre de Recherche en Anthropologie et Sciences Humaines, N'Djamena, Chad

9

10 <sup>5</sup>Corresponding author: Esias Bedingar

11

12 655 Huntington Avenue

13 Boston, MA 02215, USA

14 +1 279 222 5756

15 [esias\\_bedingar@g.harvard.edu](mailto:esias_bedingar@g.harvard.edu)

16

17 E-mail addresses of authors:

18 NB: [bedi.ngarossorang2019@gmail.com](mailto:bedi.ngarossorang2019@gmail.com)

19 DS: [djimet\\_selde@yahoo.fr](mailto:djimet_selde@yahoo.fr)

20 CS: [csudfeld@gmail.com](mailto:csudfeld@gmail.com)

21

22 Keywords: adolescent dating, HIV perceptions, cultural influences, risk behaviors, prevention, Chad

23

24 Word count:

25 Abstract: 298/350

26 Main text: 4200/5000

27

28

29

30

31

## 32 **Abstract**

33 **Introduction:** The study focuses on understanding the complex interplay between dating behaviors and  
34 HIV perceptions among adolescents and young people (ages 15-24 years) in Chad. As adolescents and  
35 young people are disproportionately affected by the HIV epidemic, this research aims to uncover how  
36 cultural and social influences shape young people's attitudes towards dating and HIV prevention. The  
37 significance of this study lies in its potential to inform targeted, culturally sensitive HIV prevention  
38 strategies for the youth in Chad.

39  
40 **Methods:** A qualitative phenomenological approach was adopted, using 4 focus group discussions (n=12  
41 each) with high school students in N'Djamena, Chad. Participants were divided into beneficiary and non-  
42 beneficiary groups based on their exposure to a peer education program about HIV. Data analysis was  
43 conducted using ATLAS.ti software and the descriptive Colaizzi method, ensuring a comprehensive  
44 understanding of participants' perspectives.

45  
46 **Results:** Findings revealed significant gender differences in dating motivations and partner selection  
47 criteria. While males primarily viewed dating as a means to fulfill sexual desires, females often sought  
48 emotional connection and companionship. There was a general lack of awareness about PrEP, with  
49 more emphasis on condom use for pregnancy prevention rather than HIV or STI protection. Gender  
50 roles played a substantial part in decisions regarding safe sex practices, with a notable discrepancy in  
51 shared versus individual responsibility. Additionally, risk behaviors like alcohol use and multiple  
52 partnerships were identified as prevalent among youth.

53  
54 **Conclusions:** The study highlights the need for gender-sensitive educational interventions focusing on  
55 the realities of adolescent sexual behavior in Chad. It underscores the disparity in HIV knowledge and  
56 prevention awareness among adolescents, pointing out the absence of awareness about PrEP. Future  
57 research should emphasize developing HIV prevention strategies that resonate with the unique cultural  
58 and social dynamics of Chadian youth, considering their specific dating behaviors and perceptions  
59 towards HIV.

60  
61 **Word Limit: 298 words**

62

63

## 64 **1. Introduction**

65 Young people ages 15-24 years contribute to almost half of all new HIV infections globally [1].  
66 Approximately, 80% of HIV-positive youth reside in sub-Saharan Africa (SSA) [2]. Chad is a country  
67 located in Central Africa with an overall prevalence of 1.0% in 2022 [3]. It is estimated that the HIV  
68 prevalence among youth ages 15-24 years is 1.3% for females and 0.8% for males [4]. Notably, within  
69 the female youth age group, the prevalence increases with age with a prevalence of 1.2% for age 15-19  
70 years, 1.8% for the 18-19 years, and 2.4% for 23-24 years [4]. Interventions to reduce incidence among  
71 adolescents are not a focus in Chad while intervention strategies emphasize preventing mother-to-child  
72 transmission [4]. The focus on PMTCT may be due to Chad's cultural norms, where discussing sexuality  
73 remains a sensitive topic, which limits open conversations about reproductive health [5].

74  
75 In Chad, understanding the dynamics of dating culture is crucial for comprehending the risks and  
76 behaviors associated with HIV among youth. The dating scene among Chadian youth, characterized by  
77 traditional customs intertwined with modern influences, plays a pivotal role in shaping their perceptions  
78 and actions related to HIV risk. However, adolescents face substantial challenges in accessing reliable  
79 information and resources to HIV [5]. In this context, peer education in schools has emerged as a  
80 potential strategy for behavior change [6]. Peer-led HIV education programs in schools aim to bridge this  
81 gap by providing accurate information and fostering supportive environments and these programs can  
82 leverage the unique position of peers who can communicate complex health messages in a relatable and  
83 understandable manner [7]. In 2012, the "Life Skills and Peer Education" initiative, also known as the  
84 BCC Lifeskills Project (2012-2016), was initiated by Blue Cross Chad for at-risk students aged 14-18 in  
85 schools [8, 9]. This project's goal was to enhance understanding and skills for making educated choices  
86 regarding substance abuse, alcohol, and the risks linked with HIV. The program included peer educators  
87 trained in life skills who covered various subjects, from HIV prevention to transmission, using interactive  
88 teaching methods like group activities and role-playing.

89  
90 From 2012 to 2016, the BCC LBSE was conducted in 15 high schools in N'Djamena and later expanded to  
91 20 schools by 2021. With the desire to inform programmatic strategies for scale-up, we conducted a  
92 qualitative study to explore the experiences of the youth in reproductive health and HIV and AIDS. The  
93 study also aimed to understand how the dating culture and practices influence adolescents' knowledge,  
94 misconceptions, and prevention strategies regarding HIV. Insights from this study are intended to inform

95 the development of effective HIV prevention and education programs tailored to the unique context of  
96 Chadian adolescents.

97

## 98 **2. Methods**

### 99 **2.1. Study setting, design, and participants**

100 This qualitative research study was carried out in N'Djamena, which was purposefully chosen because  
101 Blue Cross Chad (BCC) had introduced its program in 20 local high schools. N'Djamena is Chad's largest  
102 and capital city. With a population of 1 538 387 people, N'Djamena is composed of 10 districts [10]. As  
103 previously mentioned, the HIV prevalence stood at 1.0% in 2022 [3]. Although there is a 48% decrease in  
104 new HIV infections since 2010, adolescents are disproportionately affected by the epidemic [11].  
105 According to UNAIDS, 26.3% of new HIV infections were in adolescents and young people (ages 15-24  
106 years) in 2022 [11]. Prior to this, they represented 28.4% and 30.8% of new HIV infections in 2010 and  
107 2015, respectively [11]. Despite all the progress made, young women continue to suffer  
108 disproportionately from the HIV epidemic, more specifically due to the HIV triple threat, which is known  
109 as the combination of new HIV infections, sexual and gender-based violence, and adolescent  
110 pregnancies [12]. Young women have HIV infection rates four times as high as young men, accounting  
111 for 19.5% of all new HIV infections [11].

112

113 The research design was based on descriptive phenomenology, adhering to the philosophical principles  
114 established by Edmund Husserl [13]. As we were interested in the youth's experience of HIV supportive  
115 norms, the methodology was particularly effective in capturing and understanding the unique  
116 perspectives and experiences of the participants [14, 15]. Husserl's four-step process of descriptive  
117 phenomenology – bracketing, intuiting, analyzing, and interpreting – guided the research [16]. The  
118 research took careful measures to maintain objectivity, especially in focus group discussions (FGDs), by  
119 regularly discussing and setting aside any preconceived notions about youth behavior. This was crucial  
120 since the interviewers were part of the same organization that aimed to increase HIV prevention  
121 awareness, necessitating a methodological approach that prioritized describing experiences over-  
122 interpreting them.

123

124 In selecting participants, a purposeful criterion was used, targeting students from both schools that  
125 participated in the BCC LBSE program and those that did not, to effectively evaluate the program's  
126 impact. FGDs were further stratified by gender to create a comfortable environment for participants to

127 openly share their views. The criteria for selection included students currently enrolled in grades 9 to 12.  
128 For students in participating schools, a minimum of six months' participation in the program was  
129 required to ensure adequate exposure to the intervention. The selection process involved using student  
130 lists from school registrars, excluding those with incomplete information. The study formed four groups  
131 of 12 participants each. Despite the typical FGD size being 6-8 participants, a larger group size was  
132 chosen to enhance the diversity of perspectives and group dynamics. However, due to the exploratory  
133 nature of the study, saturation was not reached. To recruit participants, especially those under 18,  
134 school officials contacted parents to inform them about the research and its objectives. Parental  
135 consent was then obtained either in writing, during a visit to the school for those who agreed over the  
136 phone, or through verbal consent if an in-person visit was not feasible. Additionally, the COREQ checklist  
137 was employed to ensure thorough and transparent reporting of the qualitative research methods and  
138 findings [17], as detailed in the supporting information (S2 Appendix).

139

## 140 **2.2. Data collection and analysis**

141 The data was collected between October 4<sup>th</sup> and 6<sup>th</sup>, 2022. In the qualitative component of the study, six  
142 staff members from the BCC program were selected as interviewers. These individuals were organized  
143 into two groups, each comprising three researchers, with at least one female interviewer in each team.  
144 Before commencing the study, they received training in qualitative research methodologies, including  
145 interview techniques. The decision to use interviewers who were locally trained and familiar with the  
146 community was advantageous for gaining access and acceptance within the community. Although we  
147 used interviewers who were part of the same organization implementing BCC LBSE, the interviewers  
148 selected were not directly involved in the execution of the program, which ensured an unbiased  
149 approach.

150

151 FGDs were carried out in French and Arabic using a semi-structured guideline (S1 Appendix). The  
152 interviews were conducted in a private and secure location at the BCC headquarters. Each FGD lasted  
153 between 90-120 minutes, with the transcription process taking about 3-4 hours per session. The team  
154 collectively reviewed each transcript to accurately capture cultural nuances. During the FGDs,  
155 participants were encouraged to express their views, perceptions, experiences, and beliefs about  
156 sexuality, particularly in the context of HIV transmission and prevention. The sessions began with an  
157 overview of the interview's purpose, assurances of confidentiality, and the collection of either written or  
158 oral informed consent from the respondents. All discussions were meticulously recorded, transcribed

159 verbatim, and then translated by the entire team, ensuring that the translations retained the cultural  
 160 context and nuances.

161  
 162 For data analysis, the team utilized ATLAS.ti version 22, a qualitative analysis software [18]. The  
 163 descriptive Colaizzi method was used to analyze the data, which emphasized the importance of  
 164 participants' perspectives, striving to present an authentic and comprehensive understanding of their  
 165 experiences [19]. This method included steps, including familiarization, identifying significant  
 166 statements, formulating meanings, clustering themes, developing an exhaustive description, producing  
 167 the fundamental structure, and seeking verification of the fundamental structure [19]. Each team  
 168 member read a subset of interviews, formulating the themes after summarizing and extracting the  
 169 meaningful contents, bracketing the presumptions of the researchers. This process resulted in five sub-  
 170 themes, which were further categorized into two broad themes as summarized in Table 1.

171  
 172 **Table 1. Emergent thematic levels**

| Themes                              | Sub-themes                                        | Codes                                                                                                         |
|-------------------------------------|---------------------------------------------------|---------------------------------------------------------------------------------------------------------------|
| Culture of dating                   | Reasons for dating                                | Seeking companionship; Sharing ideas; Good company; Peer pressure; Curiosity; Need satisfaction; Pleasure     |
|                                     | Process of partner's choice                       | Emotional attraction; Family-oriented goals; Physical attraction; Financial rewards; Non-financial rewards    |
| Awareness and risk-taking behaviors | HIV transmission                                  | Mother-to-Child Transmission; Unprotected sex; Soiled objects; Blood transmission; Blood pacts                |
|                                     |                                                   | Weight loss; itching; and diarrhea                                                                            |
|                                     | HIV risk-taking behaviors and prevention methods  | Abstinence; Sexual vagrancy; Safe sex; PrEP; Condoms; Practicing secondary abstinence; Dual protection nature |
|                                     | Gender roles in safe sex practice decision-making | Shared vs. individual responsibility; Prevention; HIV                                                         |

|  |  |         |
|--|--|---------|
|  |  | testing |
|--|--|---------|

173

### 174 **2.3. Trustworthiness**

175 To ensure the integrity and consistency of the data, known as trustworthiness, the team applied Lincoln  
176 and Goba’s evaluative criteria, encompassing credibility, transferability, dependability, and  
177 confirmability [20]. The researchers extracted and categorized text associated with the codes,  
178 comparing similarities and differences. Given that the interviewers were locals with an understanding of  
179 the regional culture, they actively participated in this analytical process. The coding tree's dependability  
180 was affirmed through a consensus among team members on the definitions and criteria for code  
181 inclusion or exclusion. Confirmability was attained by meticulously documenting and archiving all stages  
182 of the research process, including multiple revisions and discussions of the primary and secondary  
183 categories identified by the researchers.

184

### 185 **2.4. Reflexivity**

186 In terms of reflexivity, the diverse and multinational qualitative research team, proficient in multiple  
187 languages and disciplines, worked to minimize potential biases in the analysis. The inclusion of locally  
188 trained interviewers aided in capturing cultural nuances and facilitated acceptance within the  
189 community. This aspect of the research was reflexive and collaborative, engaging continuously with the  
190 NGO partner, school and government officials, and development organizations. Despite the team's  
191 diverse composition, potential biases in the conclusions could not be entirely ruled out. To address this,  
192 triangulation was applied, involving sharing findings with community members not interviewed and  
193 experts on the subject to identify possible inaccuracies or biases overlooked by the research team.

194

### 195 **2.5. Ethical considerations**

196 Regarding ethical considerations, approval was obtained from both the Harvard T.H. Chan School of  
197 Public Health’s Institutional Review Board (protocol #IRB21-1641) and the National Committee on  
198 Bioethics of Chad (#036CMT/PC/PMT/MESRI/SG/CNBT/2022). Informed consent forms were read aloud  
199 by the interviewers before the FGDs began. Participants had the opportunity to ask questions during the  
200 consent process and gave verbal consent. The research did not involve participants in its design,  
201 conduct, reporting, or dissemination due to practical and ethical limitations.

202

### 203 **2.6. Limitation**

204 This study included some limitations. Firstly, the study utilized descriptive phenomenology, a method  
205 that can potentially lead to researcher bias influencing everything from the research question's  
206 development to data interpretation. To mitigate this, efforts were made to reduce the impact of the  
207 researchers' personal beliefs, values, and experiences. This was achieved by thoroughly reviewing and  
208 discussing focus group discussion (FGD) transcripts before conducting interviews, thereby ensuring that  
209 any assumptions made by the interviewer did not overshadow the participants' actual experiences.  
210 Secondly, our study focused solely on high school students, excluding those not in formal education,  
211 who comprise 70 to 82% of the Chadian youth population. Finally, the study did not specifically address  
212 populations most at risk for HIV, such as youth involved in sex work, MSM, transgender individuals, and  
213 injection drug users. This omission is significant considering the pivotal role these groups play in HIV  
214 transmission, where young people are not only overrepresented but also tend to have higher infection  
215 rates within these groups.

216

### 217 **3. Results**

218 Data collection included forty-eight in-classroom high school students divided into four FGDs. Each  
219 group included an equal number (n=12) of males and females. Of the 48 participants, 17 and 18  
220 students were respectively enrolled in 10<sup>th</sup> and 11<sup>th</sup> grades representing the largest group (73%) of the  
221 sample (Table 2). The mean age of the participants was approximately 17 years. The IDs used in this  
222 study were not known to anyone outside of the research group.

223

224 **Table 2. Sociodemographic characteristics of participants**

| Participant characteristics    | N (%) or mean (SD) |
|--------------------------------|--------------------|
| <b>High school student sex</b> |                    |
| Male                           | 24 (50%)           |
| Female                         | 24 (50%)           |
| <b>High school grade</b>       |                    |
| 9 <sup>th</sup> grade          | 6 (12.5%)          |
| 10 <sup>th</sup> grade         | 17 (35.5%)         |
| 11 <sup>th</sup> grade         | 18 (37.5%)         |
| 12 <sup>th</sup> grade         | 7 (14.5%)          |

225

226 By employing descriptive phenomenology, the analysis of the youth's life experiences of supportive  
227 norms revealed two main themes: the culture of dating and risk-taking behaviors. Each theme includes  
228 sub-themes, as summarized in Table 1. Select respondent quotations, further illuminating the results



229 shared below, can be found in Tables 3 and 4 for the dating culture and risk-taking behaviors about HIV,  
230 respectively.

231

### 232 **3.1. Taking a step back: What is the culture of dating among the youth in Chad?**

#### 233 **3.1.1. Reasons for dating**

234 Students expressed various reasons for dating; however, two main categories emerged, including those  
235 who were in a relationship because they were seeking companionship and others whose motivations  
236 were driven by sexual behavior. Among females, the search for companionship was shared as the  
237 primary reason for dating. Although their initial reason for dating was due to wanting good company,  
238 some female beneficiaries also indicated they felt pressured by their partners to engage in sex during  
239 their relationship. On the other hand, the interest in dating was primarily driven by sex for male  
240 beneficiaries. Males recognized that their interests in dating were different from their female  
241 counterparts. They mentioned that it was due to their “*need satisfaction*” (NBM, #25, age range 16-20)  
242 and further elaborated by stating that “*this means that for us, sex is a sign of maturity, or it means that*  
243 *we want to test our masculinity.*” (BM, #11, age range 16-20)

244

#### 245 **3.1.2. The process of partners' choice**

246 In interviews, there were multiple reasons discussed for choosing a specific partner. Partners' choices  
247 were classified into two main categories: intrinsic and extrinsic motivations, as summarized in Table 3. In  
248 this study, emotional attraction remained one of the reasons for choosing a partner for both females  
249 and males. Additionally, male beneficiaries stated that their partner choice depended on their  
250 motivation to form a family.

251

### 252 **Table 3. Selected quotes for the dating culture among the youth in Chad**

| Sub-themes         | Codes                                 | Selected quotes                                                                                                             |
|--------------------|---------------------------------------|-----------------------------------------------------------------------------------------------------------------------------|
| Reasons for dating | Seeking companionship                 | “A friend to share ideas with” (BM, #24, age range 16-20)                                                                   |
|                    | Felt peer-pressured                   | “I believe that what motivates young people like me to practice sex is peer pressure and desire” (BF, #20, age range 11-15) |
|                    | Motivations driven by sexual behavior | “There were differences in the needs of young women and men” (BM, #5, age range 11-15)                                      |

|                             |                      |                                                                                                                                                                                                                                                                                             |
|-----------------------------|----------------------|---------------------------------------------------------------------------------------------------------------------------------------------------------------------------------------------------------------------------------------------------------------------------------------------|
|                             |                      | <p>“Need satisfaction” (NBM, #25, age range 16-20)</p> <p>“Men of our age have sex just to satisfy themselves and for pleasure” (NBM, #28, age range 16-20)</p>                                                                                                                             |
| Process of partners’ choice | Intrinsic motivation | <p>“The culture around dating is focused on emotional attraction and sharing ideas” (BF, #21, age range 16-20)</p> <p>“What is involved in dating is to...end up with a marriage around the family and having common projects” (BM, #5, age range 11-15)</p>                                |
|                             | Extrinsic motivation | <p>“Our choice of partners is based on physical appearance” (BM, #3, age range 16-20)</p> <p>“We date men because of money” (NBF, #39, age range 16-20)</p> <p>“for me, I choose my partner based on the fact that she is helpful, and she offers me gifts” (NBM, #26, age range 16-20)</p> |

253

254 As mentioned above, extrinsic motivations were also identified. First, physical attraction was mentioned  
 255 as a motivation for males and females, whether it was between and within groups. In addition, there  
 256 were other extrinsic motivations, more specifically being motivated by financial rewards, such as money  
 257 and other financial reasons.

258

### 259 3.2. Awareness and risk-taking behaviors about HIV

260 The previous section dissected the nuances of dating culture among the youth in Chad, analyzing their  
 261 motivations, behaviors, and the social contexts of their romantic relationships. The following section  
 262 presents a detailed examination of the youth’s understanding and management of HIV risks, elucidating  
 263 the critical connection between their dating lives and vulnerability to HIV.

264

265 **Table 4. Selected quotes for risk-taking behaviors about HIV**

| Sub-themes       | Codes                     | Selected quotes                                                                                                                                  |
|------------------|---------------------------|--------------------------------------------------------------------------------------------------------------------------------------------------|
| HIV transmission | Change in knowledge level | <p>“Knowledge has changed through Blue Cross Chad” (BF, #16, age range 16-20)</p> <p>“Blue Cross Chad has shaped [our] beliefs about HIV and</p> |

|                                                   |                        |                                                                                                                                                                                                                                                                                                                                                                                                                                  |
|---------------------------------------------------|------------------------|----------------------------------------------------------------------------------------------------------------------------------------------------------------------------------------------------------------------------------------------------------------------------------------------------------------------------------------------------------------------------------------------------------------------------------|
|                                                   |                        | <p>AIDS” (BM, #8, age range 16-20)</p> <p>“[We] could now practice it responsibly” (BM, #10, age range 16-20)</p>                                                                                                                                                                                                                                                                                                                |
|                                                   | Good knowledge         | “[It] could be transmitted from mother to children during childbirth, unprotected sex with an infected person, and soiled objects” (BF, #18, age range 16-20)                                                                                                                                                                                                                                                                    |
|                                                   | Mixed knowledge        | <p>“[It is] a contagious disease that is transmitted through blood and mosquitoes” (NBM, #32, age range 16-20)</p> <p>“[It could be transmitted through] sex, skin contact, and blood transmission” (NBM, #35, age range 16-20)</p>                                                                                                                                                                                              |
| HIV risk-taking behaviors                         | Alcohol                | “I believe that women of my age take risks when they are drunk or intoxicated” (NBF, #41, age range 16-20)                                                                                                                                                                                                                                                                                                                       |
|                                                   | Sexual vagrancy        | “I also believe that risks come from having multiple partnerships or even ignorance” (NBF, #42, age range 16-20)                                                                                                                                                                                                                                                                                                                 |
| HIV prevention methods                            | Abstinence             | “Safe sex is about protecting yourself, your partner, as well as avoiding transmission of diseases, or actively abstaining from sex” (NBF, #40, age range 16-20)                                                                                                                                                                                                                                                                 |
|                                                   | Condoms                | “The use of condoms is very important for young people” (BM, #17, age range 16-20)                                                                                                                                                                                                                                                                                                                                               |
|                                                   | Risk perception        | <p>“In my case, I believe that we are worried about risks of getting infected with HIV, but also STIs. However, pregnancy is more important” (NBF, #39, age range 16-20)</p> <p>“...more concerned about pregnancy than about STIs” (BF, #22, age range 16-20)</p> <p>“Young people are more worried or preoccupied with pregnancy than with STIs and HIV, yet these diseases are very dangerous” (BM, #17, age range 16-20)</p> |
|                                                   | Dual protection nature | “The youth think that condoms prevent disease and pregnancy” (NBM, #33, age range 16-20)                                                                                                                                                                                                                                                                                                                                         |
| Gender roles in safe sex practice decision-making | Shared responsibility  | “Responsibility for protecting oneself from risk during sex lies with both partners” (BF, #15, age range 16-20)                                                                                                                                                                                                                                                                                                                  |
|                                                   | Individual             | “Men are responsible for protecting themselves during sex”                                                                                                                                                                                                                                                                                                                                                                       |

|  |                |                                                                                                                                                                                   |
|--|----------------|-----------------------------------------------------------------------------------------------------------------------------------------------------------------------------------|
|  | responsibility | (NBM, #32, age range 16-20)<br><br>“The girl is the one responsible when it comes to sexual intercourse...this is why it is important to do the test” (NBF, #45, age range 11-15) |
|--|----------------|-----------------------------------------------------------------------------------------------------------------------------------------------------------------------------------|

266

267 **3.2.1. HIV transmission**

268 Overall, the beneficiary groups highlighted a change in their level of knowledge post-peer education  
269 program in their respective high schools. They further stated that this latter has left them feeling more  
270 prepared when having sex. Moreover, males and females in the beneficiary group, as well as females in  
271 the non-beneficiary group, were able to correctly explain what the disease entailed, its transmission  
272 routes, and associated symptoms. They frequently mentioned perinatal (mother-to-child), or  
273 unprotected sex with an HIV infected person as HIV transmission modes. However, males in the non-  
274 beneficiary group showed some mixed knowledge.

275

276 **3.2.2. HIV risk-taking behaviors**

277 When it comes to risky sexual behaviors and HIV, all groups identified several factors that may place  
278 individuals at greater risk. Alcohol was indicated as a potential factor. Some also identified multiple  
279 concurrent partnerships.

280

281 **3.2.3. HIV prevention methods**

282 Both female beneficiaries and non-beneficiaries mentioned that abstinence was a popular prevention  
283 method. On the other hand, male beneficiaries highlighted that abstaining is “*abstaining is hardly*  
284 *encouraged among them*” (BM, #8, age range 16-20) since most of them are sexually active at a young  
285 age.

286

287 Condoms were identified as an important prevention method among the youth. Even though the use of  
288 condoms was commonly cited to practice safe sex, it was primarily seen as pregnancy prevention and  
289 not to reduce the risk of HIV or other STIs in both female beneficiaries and non-beneficiaries. On the  
290 other hand, this was only cited in beneficiary males who recognized a higher risk perception for  
291 pregnancy than for STIs among Chadian youth. For this reason, condoms were attractive to them  
292 because of their dual protection nature.

293

294 **3.2.4. Gender roles in safe sex practice decision-making**

295 In the beneficiary group, both males and females believed that they had a shared responsibility when it  
296 came to practicing safe sex. This shared responsibility was not identified in the non-beneficiary group  
297 and differed across gender. In the non-beneficiary male group, it was noted that the responsibility of  
298 men lay in only wearing a condom, whereas women were responsible for getting tested for HIV.

299  
300 **4. Discussion**

301 We conducted a qualitative study to delve into the perceptions and experiences of Chadian youth  
302 regarding HIV supportive norms, comparing students who received peer HIV education with those who  
303 did not. First, our findings revealed distinct motivations for dating among Chadian youth: females  
304 primarily sought companionship, while males were driven by sexual desires, often leading to pressure  
305 for sex in relationships. Partner choice hinged on emotional and physical attraction, with extrinsic  
306 motivations like financial benefits also playing a role. Post-education, both genders showed improved  
307 HIV knowledge, identifying transmission routes and prevention methods. However, misconceptions  
308 persisted, especially among non-beneficiary males. Risky behaviors like alcohol use and multiple  
309 partnerships were recognized, and while condom use is common, it was seen more for pregnancy  
310 prevention than for HIV/STI protection. Finally, gender differences emerged in perceptions of safe sex  
311 practices, with beneficiary groups viewing it as a shared responsibility, unlike non-beneficiaries.

312  
313 Our findings revealed distinct reasons for dating among Chadian youth, especially males and females.  
314 The search for companionship identified among female beneficiaries and sexual satisfaction in males  
315 were also observed in a study (2007) conducted among inner-city black adolescents in the United States  
316 [21]. According to Andrinopoulos et al. (2007), young women often look for romantic connections,  
317 whereas young men pursue both sexual and romantic relationships [21]. These findings were in line with  
318 Buss' sexual strategies theory, which suggests distinct approaches to sexual relationships by men and  
319 women [22]. Additionally, the concept of sexual vagrancy, described by men as a way to prove their  
320 masculinity, was a common social phenomenon among young men. This notion was supported by  
321 Andrinopoulos et al. (2007), who noted that having multiple partners was seen as a means for young  
322 men to elevate their social standing among peers [21].

323  
324 Our study identified two primary categories in partner selection criteria: intrinsic and extrinsic  
325 motivations. Intrinsic motivation, stemming from internal characteristics such as personality, values, and

326 interests, was evident in the preference for emotional connection and a family-centric partnership [23].  
327 This reflected a deep, value-driven approach to relationships, highlighting the importance of personal  
328 and emotional factors in choosing a partner. On the other hand, extrinsic motivation is influenced by  
329 external factors like physical attractiveness and financial status. The focus on these superficial aspects  
330 suggests that physical and material attributes played a significant role in partner selection. This  
331 dichotomy in motivations enhanced our understanding of partner selection, especially among Chadian  
332 youth, providing a comprehensive perspective on the interplay between deep-seated values and  
333 external allurements in choosing a partner. Further research in various African contexts supported these  
334 findings. A study in Ghana by Ampofo (1997) among young women showed that love, affection, and the  
335 desire for children were crucial in partner selection, aligning with the intrinsic factors we identified [24].  
336 However, financial capability was also a significant consideration, resonating with our observations of  
337 extrinsic motivations [24]. This economic aspect of partner selection was noted in Meekers and Calvès'  
338 study (1992) in Cameroon, particularly among women in low-income sectors who viewed financial  
339 support as a means of survival or accessing capital [25]. Similarly, Nicole De Wet's research in South  
340 Africa (2019) found that young women, especially those aged 20-24 and students, were more likely to  
341 choose older partners for financial benefits [26]. This underscored the complex interplay of emotional,  
342 personal, and economic factors in partner selection across different African cultures.

343  
344 A concerning revelation from our study is the gap in HIV awareness, particularly among non-beneficiary  
345 males. This group displayed misconceptions about HIV transmission, underscoring the need for targeted  
346 educational interventions. However, increased knowledge did not necessarily translate into safer  
347 behaviors, as seen in persistent risky practices like intoxication and unprotected sex. This echoed Swahn  
348 et al.'s findings (2021) on the overlooked roles of alcohol consumption and gender-based violence in HIV  
349 risk [27]. Furthermore, our findings highlighted that young women often feel pressured into sexual  
350 activities, which were in line with Plichta et al.'s observations (1991) about the lack of control women  
351 have over sexual encounters and condom use [28]. This latter was also confirmed by DUBY et al. (2021),  
352 especially mentioning the power inequities in condomless sex for South African adolescent girls and  
353 young women [29]. The gendered attitudes towards sexual health responsibility, shaped by societal  
354 norms, call for gender-sexual health education. Studies like Wathuta (2016) emphasize the need for  
355 accurate gender dynamics representation in HIV responses [30]. Moreover, Ruppe et al. (2021)  
356 highlighted the role of women's healthcare providers in HIV prevention resonating with our findings in  
357 Chad [31].

358

359 The absence of awareness about Pre-Exposure Prophylaxis (PrEP) in Chad is a significant gap in HIV  
360 prevention. As PrEP is not readily available in Chad, advocacy efforts are crucial for its accessibility.  
361 Despite this, there's a pressing need to start raising awareness about PrEP's effectiveness in HIV  
362 prevention. Current prevention strategies primarily focus on abstinence and condom use, driven more  
363 by pregnancy concerns than HIV or STIs, especially among females. This reflects the societal  
364 prioritization of certain risks over others. However, the prevalent 'abstinence' culture contrasts sharply  
365 with the reality of adolescent premarital sex, often leading to stigma rather than open discussion [32,  
366 33]. Additionally, the use of abstinence as a strategy for preventing HIV has been found to be ineffective  
367 [32, 33]. Addressing this mismatch requires a shift in societal norms. Engaging adolescents, families,  
368 educators, and community leaders is crucial in this endeavor. Peer health education approaches have  
369 shown promise in shifting attitudes toward sexual and reproductive health, but their design needs  
370 careful consideration to address these complex issues effectively.

371

## 372 **5. Conclusions**

373 The manuscript provided a comprehensive look at the complex interplay between adolescent dating  
374 behaviors and HIV perceptions among Chadian youth, highlighting the cultural and social influences on  
375 youth attitudes towards dating and HIV. Significant gender-based differences in dating motivations and  
376 partner selection criteria, as well as disparity in HIV knowledge and prevention awareness among  
377 adolescents were uncovered. This study underscores the need for targeted, gender-sensitive  
378 educational interventions. Notably, there was an absence of awareness about PrEP in Chad, signaling a  
379 gap in HIV prevention strategies, which are currently more focused on abstinence and condom use,  
380 driven largely by concerns over pregnancy rather than HIV or STIs. Future research should focus on  
381 addressing the realities of adolescent sexual behavior, emphasizing the role of community stakeholders  
382 in fostering effective and comprehensive sexual health education and prevention strategies. This  
383 approach will enrich the literature with dynamic insights and practical implications for HIV prevention  
384 among Chadian youth.

385

## 386 **Competing interests**

387 None declared.

388

## 389 **Author Contributions**

390 **Conceptualization:** Esias Bedingar, Christopher Sudfeld.  
391 **Methodology:** Esias Bedingar, Ngarossorang Bedingar, Christopher Sudfeld.  
392 **Investigation:** Esias Bedingar, Ngarossorang Bedingar.  
393 **Data curation:** Esias Bedingar, Ngarossorang Bedingar.  
394 **Formal analysis:** Esias Bedingar.  
395 **Funding acquisition:** Esias Bedingar.  
396 **Project administration:** Esias Bedingar, Ngarossorang Bedingar.  
397 **Supervision:** Esias Bedingar.  
398 **Visualization:** Esias Bedingar.  
399 **Writing – original draft:** Esias Bedingar.  
400 **Writing – review & editing:** Esias Bedingar, Djimet Seli, Christopher Sudfeld.

401

#### 402 **Acknowledgements**

403 We are grateful for the collaboration and support from Blue Cross Chad from which this research  
404 originated. We thank the participants for their time and willingness to share their experiences with us.

405

#### 406 **Funding**

407 The study received funding from the Rose Service-Learning Fellow at the Harvard T.H. Chan School of  
408 Public Health, and the Fostering Diversity in HIV Research Program, led by Massachusetts General  
409 Hospital and Harvard T.H. Chan School of Public Health. The Fostering Diversity in HIV Research Program  
410 is supported by the National Institutes of Health (R25MH119857).

411

#### 412 **Supporting information**

413 S1 Appendix: Semi-structured Focus Group Discussion Topic Guide

414 S2 Appendix: COREQ Checklist

415

#### 416 **References**

- 417 1. World Health Organization, UNAIDS. Children and young people in a world of AIDS. 2011. Available  
418 from: [https://www.unaids.org/sites/default/files/media\\_asset/jc656-child\\_aids\\_en\\_0.pdf](https://www.unaids.org/sites/default/files/media_asset/jc656-child_aids_en_0.pdf)
- 419 2. Kharsany AB, Karim QA. Adolescent HIV in Africa: linking local lives and global targets. Open AIDS J.  
420 2016; 10:34-48.



- 421 3. Chad Demographic and Health Surveys 2014-2015. HIV Prevalence. The DHS Program. Available  
422 from: <https://www.dhsprogram.com>.
- 423 4. UNICEF. HIV/Aids. 2019. Available from: <https://www.unicef.org/chad/hivaids>.
- 424 5. Young people desperately seeking sex education. The New Humanitarian. 2008 Feb 28. Available  
425 from: [https://www.thenewhumanitarian.org/news/2008/02/28/young-people-desperately-seeking-](https://www.thenewhumanitarian.org/news/2008/02/28/young-people-desperately-seeking-sex-education)  
426 [sex-education](https://www.thenewhumanitarian.org/news/2008/02/28/young-people-desperately-seeking-sex-education).
- 427 6. Faust L, Yaya S. The effect of HIV educational interventions on HIV-related knowledge, condom use,  
428 and HIV incidence in sub-Saharan Africa: a systematic review and meta-analysis. BMC Public Health.  
429 2018, 18:1254.
- 430 7. World Health Organization. Life skills education for children and adolescents in schools. 1997.  
431 Available from: [https://www.edu-](https://www.edulinks.org/sites/default/files/media/file/WHO_MNH_PSF_93.7A_Rev.2.pdf)  
432 [links.org/sites/default/files/media/file/WHO\\_MNH\\_PSF\\_93.7A\\_Rev.2.pdf](https://www.edulinks.org/sites/default/files/media/file/WHO_MNH_PSF_93.7A_Rev.2.pdf)
- 433 8. International Blue Cross. Blue Cross Chad Lifeskills Program 2012-2016 external evaluation. 2016.  
434 Available from: <https://www.ranasmosler.com>.
- 435 9. International Blue Cross. External evaluation about the International Blue Cross Lifeskills Programme  
436 in Chad and Congo 2021. 2021. Available from: <https://www.ranasmosler.com>.
- 437 10. N'Djamena. Wikipedia. Last modified 2023 Nov 23; cited 2024 Jan 4. Available from:  
438 [https://en.wikipedia.org/wiki/N%27Djamena#cite\\_note-1](https://en.wikipedia.org/wiki/N%27Djamena#cite_note-1)
- 439 11. République du Tchad, Conseil National de Lutte Contre le SIDA, Secrétariat Exécutif National. Plan  
440 Stratégique de Riposte au SIDA (PSN) – VIH 2018-2022 Etendu à 2025. N'Djamena : CNLS. 2021 Jun.
- 441 12. Global Communities. Ending the “Triple Threat” of early pregnancies, new HIV infections and sexual  
442 violence among adolescent girls & young women. 2022. Available from:  
443 [https://globalcommunities.org/blog/ending-the-triple-threat-of-early-pregnancies-new-hiv-](https://globalcommunities.org/blog/ending-the-triple-threat-of-early-pregnancies-new-hiv-infections-and-sexual-violence-among-adolescent-girls-and-young-women/)  
444 [infections-and-sexual-violence-among-adolescent-girls-and-young-women/](https://globalcommunities.org/blog/ending-the-triple-threat-of-early-pregnancies-new-hiv-infections-and-sexual-violence-among-adolescent-girls-and-young-women/).
- 445 13. Cresswell JW. Research design: qualitative & quantitative approaches. 15<sup>th</sup> ed. Thousand Oaks: Sage;  
446 1994.
- 447 14. Brinkmann S, Kvale S. Interviews: learning the craft of qualitative research interviewing. 2<sup>nd</sup> ed.  
448 Thousand Oaks: Sage; 2009.
- 449 15. Jackson C, Vaughan DR, Brown L. Discovering lived experiences through descriptive phenomenology.  
450 Int J Contemp Hosp Manag. 2018;30(11):3309-3325.
- 451 16. Husserl E. The phenomenology of internal time-consciousness. Bloomington: Indiana University  
452 Press; 2019.

- 453 17. Tong A, Sainsbury P, Craig J. Consolidated criteria for reporting qualitative research (COREQ): a 32-  
454 item checklist for interviews and focus group. *Int J Qual Health Care*. 2007;19:349-57.
- 455 18. Scientific Software Development GmbH. Atlas.ti 7.5.6 ed. Berlin: Scientific Software Development  
456 GmbH; 2016.
- 457 19. Colaizzi PF. Psychological research as the phenomenologist views it. Oxford: Oxford University Press;  
458 1978.
- 459 20. Lincoln YS, Guba EG. Naturalistic inquiry. Newbury Park; London; New Dehli: Sage Publications;  
460 1985.
- 461 21. Andrinopoulos K, Kerrigan D, Ellen JM. Understanding sex partner selection from the perspective of  
462 inner-city black adolescents. *Perspect Sex Reprod Health*. 2007;38(3):132-138.
- 463 22. Buss D, Schmitt D. Sexual strategies theory: an evolutionary perspective on human mating.  
464 *Psychological Review*. 1993;100(2):204-232.
- 465 23. Ryan R, Deci E. Intrinsic and extrinsic motivations : classic definitions and new directions. *Contemp*  
466 *Educ Psychol*. 2000;25:54-67.
- 467 24. Ampofo AA. Costs and rewards: Exchange in relationships: Experiences of some Ghanaian women.  
468 In: Rosander EE, editor. *Transforming Female Identities: Women's Organizational Forms in West*  
469 *Africa*. Cambridge: Cambridge University Press; 1998. p. 177-194.
- 470 25. Meekers D, Calvès AE. 'Main' girlfriends, girlfriends, marriage, and money: the social context of HIV  
471 risk behavior in sub-Saharan Africa. *Health Transition Review*. 1997;7:361-375.
- 472 26. De Wet N, Alex-Ojei C, Akinyemi J. 'I'm in love with an older man': reasons for intergenerational  
473 sexual relationships among young women in South Africa. *Cult Health Sex*. 2019;21(6):717-726.
- 474 27. Swahn MH, Culbreth R, Masyn KE, Salazar LF, Wagman J, Kasirye R. The intersection of alcohol use,  
475 gender-based violence, and HIV: Empirical findings among disadvantaged service-seeking youth in  
476 Kampala, Uganda. *AIDS Beh*. 2021;25(10):3106-3114.
- 477 28. Plichta S, Post T, Meyer MB, Weisman CS. Adolescent HIV education: The impact of dating violence  
478 on sexual behavior. Oral presentation at: American Public Health Association Annual Meeting; 1991  
479 Jun; Atlanta, GA.
- 480 29. Duby Z, Jonas K, McClinton AT, Maruping K, Dietrich J, Matthews C. "Condoms are boring":  
481 Navigating relationship dynamics, gendered power, and motivations for condomless sex amongst  
482 adolescents and young people in South Africa. *Int J Sex Health*. 2021;33(1).
- 483 30. Wathuta J. Gender inequality dynamics in the prevention of a heterosexual HIV epidemic in sub-  
484 Saharan Africa. *Afr J AIDS Res*. 2016;15(1):55-56.

- 485 31. Ruppe LB, Spencer LA, Kriebs JM. Pre-exposure prophylaxis for HIV infection and the role of the  
486 women's health care provider in HIV prevention. *J Midwifery Womens Health*. 2021;66(3):322-333.
- 487 32. Lo N, Lowe A, Bendavid E. Abstinence funding was not associated with reductions in HIV risk  
488 behavior in sub-Saharan Africa. *Health Aff*. 2016;35(5):856-63.
- 489 33. Santelli J, Grillo SA, Lindberg LD, Speizer I, Schalet A, Heitel J, Kantor L, McGovern T, Ott MA, Lyon  
490 ME, Rogers J, Heck CJ, Mason-Jones AJ. Abstinence-only-until-marriage policies and programs: An  
491 updated position paper of the Society for Adolescent Health and Medicine. *J Adolesc Health*.  
492 2017;61(3):400-403.
